# Supplementary material
Source: Springer Nature journal article supplement (https://www.springermedizin.de/resource/supplementary/12963_2009_94_MOESM2_ESM.pdf/9572714)
Supplement: MOESM2 [file 9572714]

1. Identify deaths coded to heart failure:

1 death

Age: 60  
Sex: M  
Race: White  
Place of death: Hospital  
State of residence: NH  
UCD: Heart Failure  
MCD: None listed

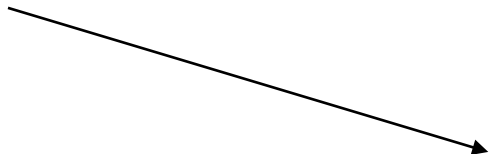

3. Redistribute deaths coded to heart failure to their controls:

6.6 deaths

Age: 60  
Sex: M  
UCD: Ischemic Heart Disease  
MCD: Heart Failure

3.3 deaths

Age: 60  
Sex: M  
UCD: COPD  
MCD: Heart Failure

1.1 deaths

Age: 60  
Sex: M  
UCD: Cancer  
MCD: Heart Failure

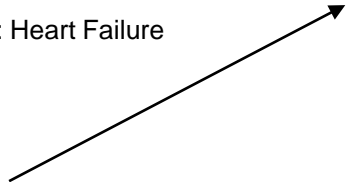

2. Find all controls (matches) of the same age, sex, and other match variables:

6 deaths

Age: 60  
Sex: M  
UCD: Ischemic Heart Disease  
MCD: Heart Failure

3 deaths

Age: 60  
Sex: M  
UCD: COPD  
MCD: Heart Failure

1 death

Age: 60  
Sex: M  
UCD: Cancer  
MCD: Heart Failure
